# Supplementary material for: Evaluation of an Intergenerational and Technological Intervention for Loneliness: Protocol for a Feasibility Randomized Controlled Trial
Source: JMIR Res Protoc. 2021 Feb 17;10(2):e23767. doi: 10.2196/23767 (PMC7929741; doi:10.2196/23767)
Supplement: Multimedia Appendix 2 [file resprot_v10i2e23767_app2.pdf]

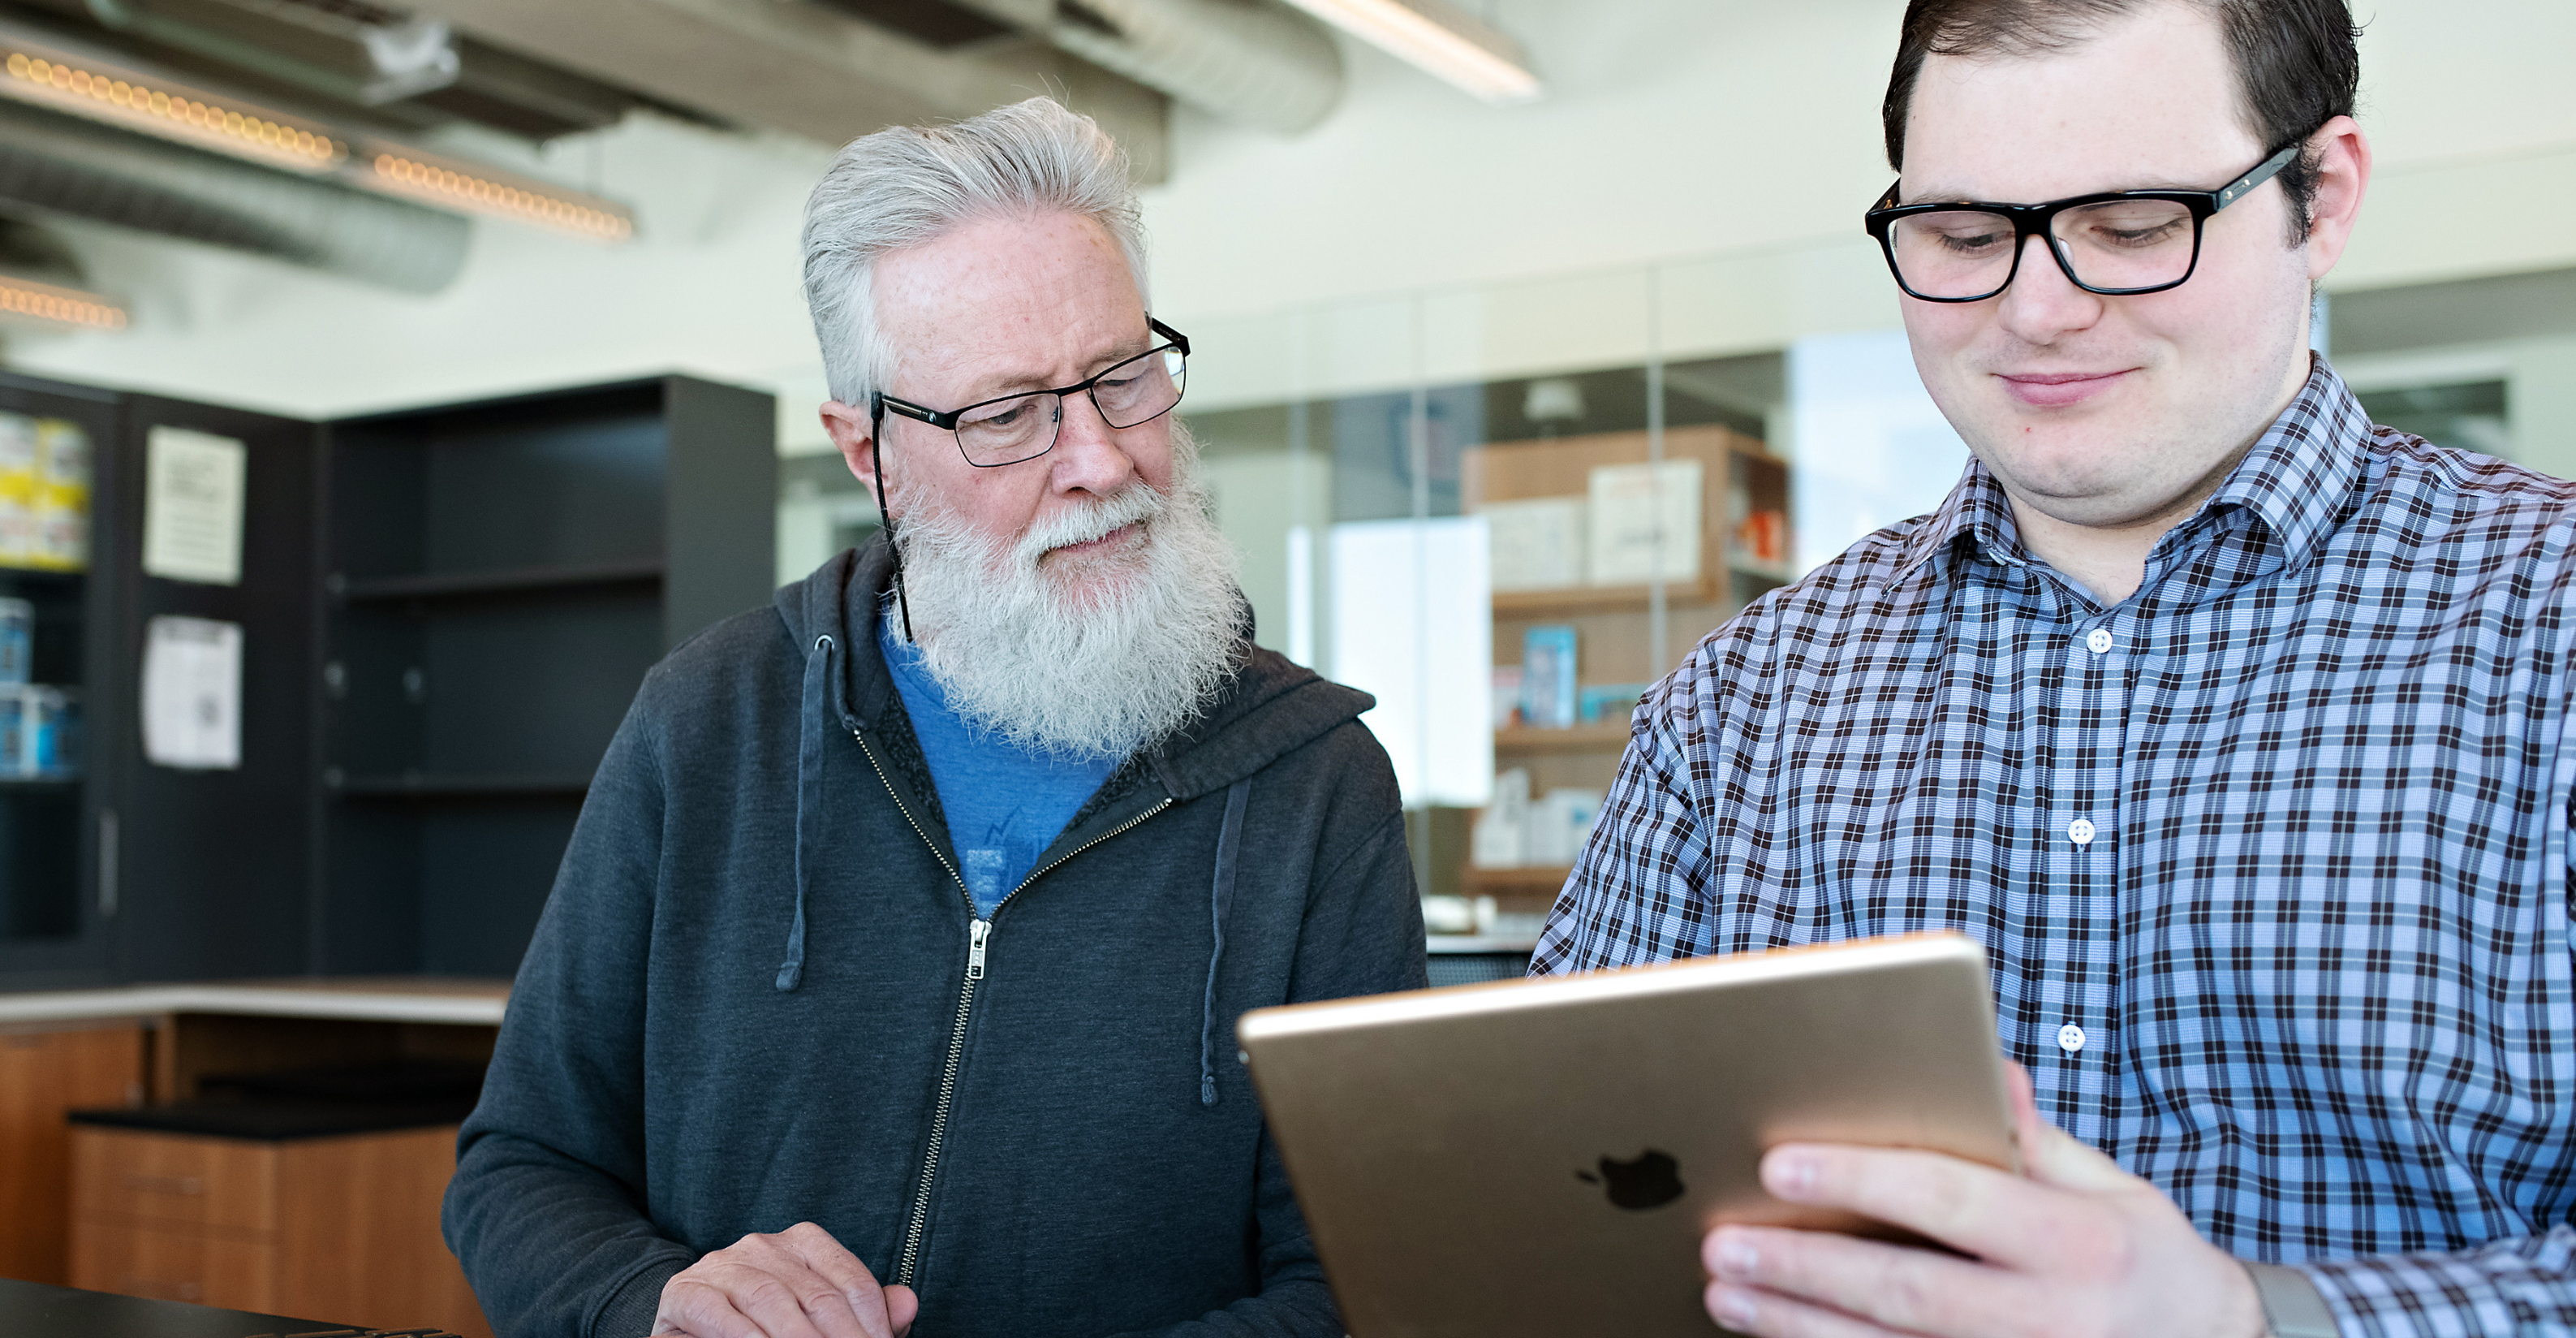

UNIVERSITY OF  
**WATERLOO**

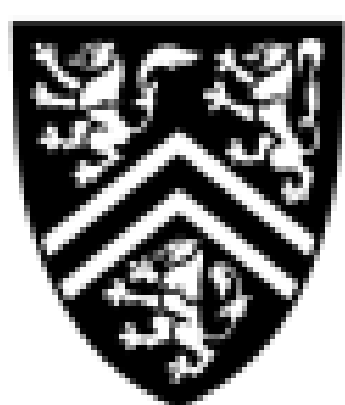

## PARTICIPANTS NEEDED FOR RESEARCH IN USING COMPUTERS TO CONNECT TO FAMILY MEMBERS

**Learn how to  
connect with your  
family members  
over email!**

CALL or EMAIL

(519) [REDACTED]

[REDACTED]@uwaterloo.ca

This study has been reviewed by, and  
received ethics clearance  
through a University of Waterloo  
Research Ethics Committee.  
ORE #41104

- Sessions once a week, around 1 hour per week
- Device loan and training provided for free
- We will ask you some questions about your experience with technology, and your mood
- NO computer experience needed
- **Must not be currently emailing family members**
